# Supplementary material for: Deep Insights into the Specific Evolution of Fungal Hybrid B Heme Peroxidases
Source: MDPI journal article supplement (doi:10.3390/biology11030459), 2022-03-17
Supplement: s1 [file s1]

**Tab.S1** DNA Primers used in this study

| Primer abbreviation | Sequence (5' → 3')       | Description                                                       |
|---------------------|--------------------------|-------------------------------------------------------------------|
| ScepHyBpoxRT-F1     | ATGAAGGCGCTATCTTTGATCAGT | <i>ScepHyBpox1</i> specific gene<br>primers designed in this work |
| ScepHyBpoxRT-R1     | AAGTCCGAGGAGATGTTGTGTTCT |                                                                   |
| ScepHyBpoxRT-R2     | GTCCTCCAAGACCAGTCTCTACAT |                                                                   |
