# Supplementary figures and images for: Deep Insights into the Specific Evolution of Fungal Hybrid B Heme Peroxidases
Source: MDPI journal article supplement (doi:10.3390/biology11030459), 2022-03-17

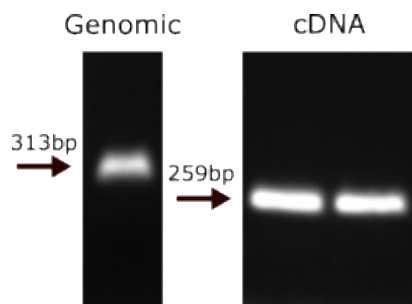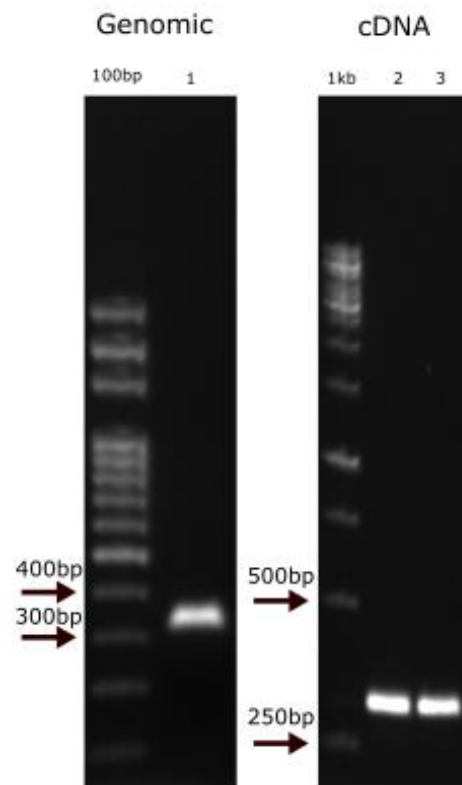

Supplement: s1 [file s1]
